# Supplementary material
Source: PubMed Central journal article supplement (PMC4534656)
Supplement: IAI.00411-15_zii999091352so1.pdf [file IAI.00411-15_zii999091352so1.pdf]

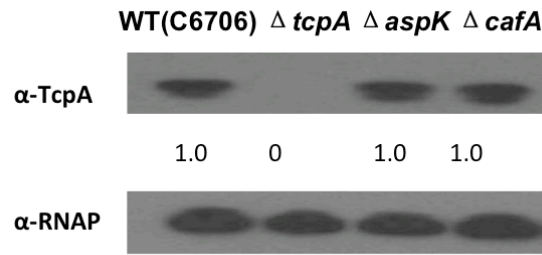

Figure S1

**Fig. S1** *aspK* and *cafA* deletion mutants show similar levels of TcpA compared to the wt in AKI conditions. TcpA expression detected by immunoblot in the indicated strains cultivated in AKI conditions; numbers correspond to densitometry measurements normalized to the value of the wt strain. Levels of RNAP alpha serve as a loading control. Densitometry measurements derived from triplicate experiments are shown.

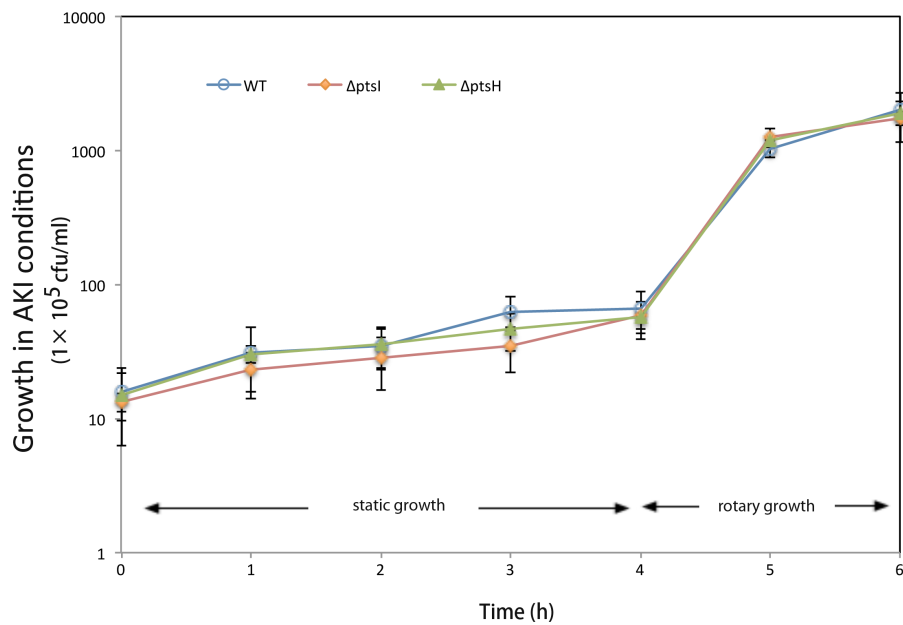

Figure S2

**Fig. S2** Growth curve of *V. cholerae* strains grown in AKI induction conditions. The cultures were sampled at indicated time points and plated on the LB agar plates with Streptomycin (200 $\mu$ g/ml) after serial dilutions. Three independent experiments were performed in triplicate.-

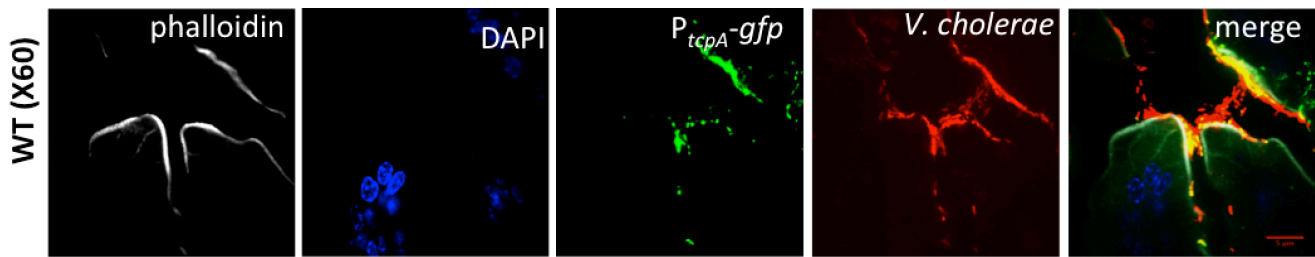

Figure S3

**Fig. S3** Heterogeneous expression of *tcpA* in wt *V. cholerae* is seen during infection of suckling mice. *V. cholerae* cells (red) in the small intestine were detected by immunofluorescence, and *tcpA* expression (green) was detected from the chromosomal  $P_{tcpA}$ -gfp reporter. Tissue sections were counterstained with phalloidin (gray) and DAPI (blue) to visualize actin and nuclei, respectively, and observed under 60× objectives.

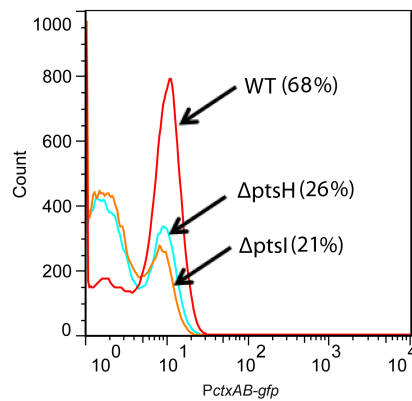

Figure S4

**Fig. S4** GFP expression from a chromosomal  $P_{ctxAB}$ -gfp in the indicated strains after growth in AKI conditions and monitored by flow cytometry

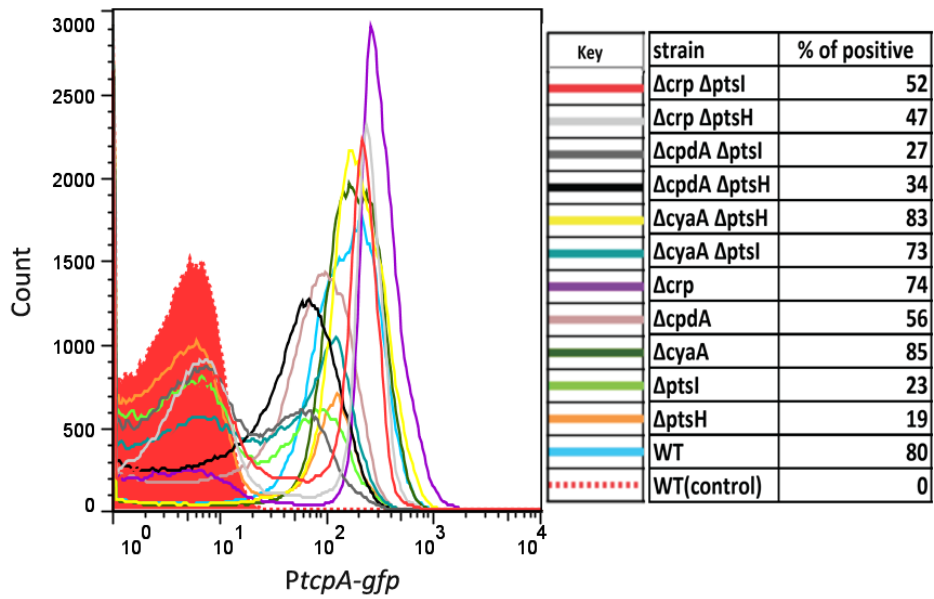

Figure S5

**Fig. S5** Flow cytometry assay of TcpA expression after the indicated strains were grown in AKI conditions. In the flow cytometry experiments, each strain contains a chromosomal  $P_{tcpA}$ -GFP reporter, except for a wt (control) strain that was used to establish the background level of fluorescence. The percentage of GFP positive cells (% of positive) are shown.

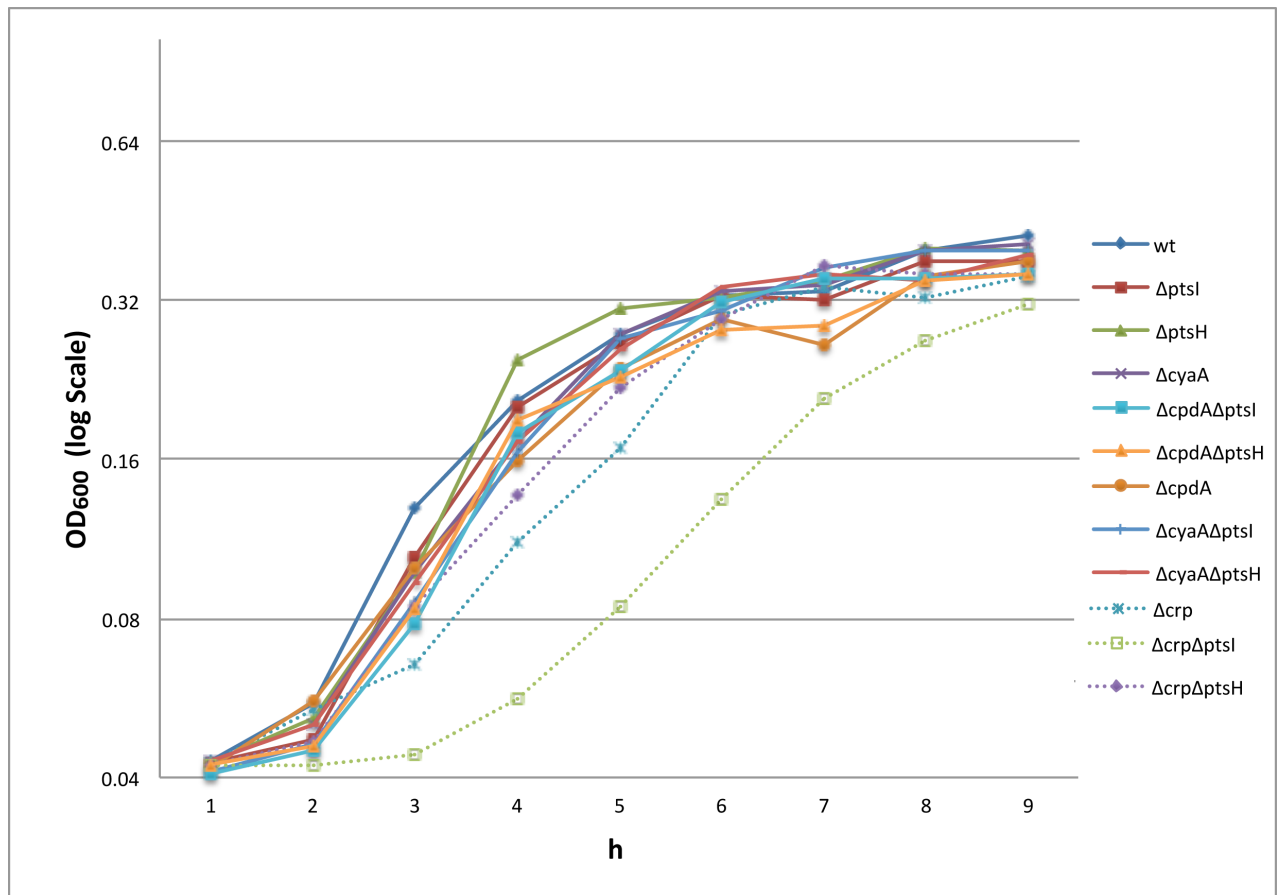

Figure S6

**Fig. S6** Growth curves of the wt and PTS related mutants incubated in LB. The bacterial cultures were sampled at indicated time points and OD<sub>600</sub> were assayed. Data represent three independent assays and values are reported as the mean.

Table S1 Primers used for this study

| Construct                    | primer name   | sequence (5'-3')*                                                |
|------------------------------|---------------|------------------------------------------------------------------|
| <i>P<sub>tcpA</sub>-bla</i>  | PtcpAF1       | tggtcgctcggcaatgaatcggggattgtaccgcgGTCTTATCATGAGCCGCCTA          |
|                              | PtcpAr1       | GGAATAAGGGCGACACGGAAATGTTGAATACTCATATTTATATAACTCCACCATTGTGTTTTAA |
|                              | blaF1         | ATGAGTATTC AACATTTCCGTGTC                                        |
|                              | blar1         | tcgtccactgatacatggcgtgatgattgtaccatGCGGCATCAGAGCAGATTG           |
| <i>P<sub>tcpA</sub>-GFP</i>  | PtcpAF2       | tggtcgctcggcaatgaatcggggattgtaccgcgGTCTTATCATGAGCCGCCTA          |
|                              | PtcpAr2       | ACA ACTCCAGTGAAAAGTCTTCTCCTTTACTCATATTTATATAACTCCACCATTGTGTTTTAA |
|                              | gfpF1         | ATGAGTAAAGGAGAAGA AACTTTTCACTG                                   |
|                              | gfpR1         | tcgtccactgatacatggcgtgatgattgtaccatTATTTGTATAGTTCATCCATGCCATG    |
| <i>P<sub>ctxAB</sub>-GFP</i> | PctxF1        | tggtcgctcggcaatgaatcggggattgtaccgcgATGTTCTCTTATTCGTTTTACGGC      |
|                              | PctxR1        | ACA ACTCCAGTGAAAAGTCTTCTCCTTTACTCATATAATGCTCCCTTTGTTTAACAGAAA    |
|                              | gfpF1         | ATGAGTAAAGGAGAAGA AACTTTTCACTG                                   |
|                              | gfpR1         | tcgtccactgatacatggcgtgatgattgtaccatTATTTGTATAGTTCATCCATGCCATG    |
| $\Delta$ VVC0547             | VC0547_UP_R   | ACATTTGCAGGGTCTAACATTAGCATAGATCAGTATTCACCTTCCCAAGACCAAAGTCT      |
|                              | VC0547_UP_F   | aggtatatgtgatgggttaaaaagatcgcctcctCGGGTGTTAACGTA CTGGT           |
|                              | VC0547_DOWN_F | GAGACTTTGGTCTTGGGAAGGTGAATACTGATCTATGCTAATGTTAGACCCCTGCAAATGT    |
|                              | VC0547_DOWN_R | ccgggagagctcgatcgcgatcgcgtacctctagTCGGCAAAACA ACTCAACCG          |
|                              | QY05476Dedo-R | TCTTGCGGAGGCACATATTACGATTTA                                      |
|                              | QY0547Deup-F  | CTGCTGGAGAAAGAGATCCAACAGT                                        |
| $\Delta$ VVC0419             | QY04196Dedo-R | AAGAGATCATCGAGCTGTTGACTA                                         |
|                              | QY0419Deup-f  | CGCCATTGGCATGTGAAATGACAATA                                       |
|                              | VC0419_UP_R   | TCACGCGCGTAATTTTCGCGCAAAATCTCAAGAGCGCACCTCAATGATTA AAAATGATTAGA  |
|                              | VC0419_UP_F   | aggtatatgtgatgggttaaaaagatcgcctcctATCCCTAGACGTCGTGAAC            |
|                              | VC0419_DOWN_F | TCTAATCATTTTAATCATTGAGGTGCGCTCTTGAGATTTTTCGCGGAAATTACGCG         |
|                              | VC0419_DOWN_R | ccgggagagctcgatcgcgatcgcgtacctctagTCGCCCGTAAATCAAGGACT           |
| pCVD442 primer               | CVD442F       | ccagccctcctgttgaagatg                                            |
|                              | CVD442R       | ACTGAGAAGCCCTTAGAGCC                                             |
| $\Delta$ VVC0965             | 0965DELUPF    | aggtatatgtgatgggttaaaaagatcgcctcctGCAGACATCACTGTGACTTCTAACG      |
|                              | 0965DELUPR    | TGGTATCAACCGATAATTACATTTTTTCTTTTTTGATGAGGGCTAAAATC               |
|                              | 0965DELDOF    | CATCAAAAAAGAAAAATGTAATTATCGGTTGATACCAAGGAGATAGG                  |
|                              | 0965DELDOR    | ccgggagagctcgatcgcgatcgcgtacctctagCCTACGGTCACTGAACCAGAAAAG       |
|                              | 0965delTupf   | TGTACGAGAAGCAAGTAGAAATCACT                                       |
|                              | 0965delTdor   | T TACTTGGTCACGCGTAGGATC                                          |
|                              | 0965delTinF   | GCAACAGATATCCGTGATATCGG                                          |
|                              | 0965delTinR   | AGATGCCGCTCATTGAGAACT                                            |
| $\Delta$ VVC0966             | 0966DELUPF    | aggtatatgtgatgggttaaaaagatcgcctcctCGGTTGAACCGGCTGAATCA           |
|                              | 0966DELUPR    | TTGAAAGGAAGACCGGATTACATGTTTTATACCCCAATGAGTTATTTTTTG              |
|                              | 0966DELDOF    | TCATTGGGGTATAAAACATGTAATCCGGTCTTCTTTCAAAGCC                      |
|                              | 0966DELDOR    | ccgggagagctcgatcgcgatcgcgtacctctagTTCGCTCAGCGATACGATGTG          |
|                              | 0966delTupf   | AAGGCACTCAAGGTA AAGCTATTCT                                       |
|                              | 0966delTdor   | TAGGCAACAAGGACA AACTTCTTGAT                                      |
|                              | 0966delTinF   | ACGAGAAGCAAGTAGAAATCACTGC                                        |

|                 |                |                                                             |
|-----------------|----------------|-------------------------------------------------------------|
|                 | 0966delTinR    | GTGAAGTTGGTCCATCAGAGCA                                      |
| ptsI complement | VC0965pbadcomf | agcgaattcgagctcggtaccggggatccTTGACCAGTTTAAAGGTAAGGCTATGAT   |
|                 | VC0965pbadcomr | aacagccaagcttgcctgcctgcaggtcgCTATCTCCTTGGTATCAACCGATAATTACG |
| ptsH complement | VC0966pbadcomf | gcgaattcgagctcggtaccggggatccACAAACTTACAAAAATAAACTCATTGGGG   |
|                 | VC0966pbadcomr | aaacagccaagcttgcctgcctgcaggtcgCATTTTGGCGTGAACAAAATGGCTTTG   |
| <i>ΔcyaA</i>    | cyaAdelTOutF   | AATCACATCGCCGCGCGTGA                                        |
|                 | cyaAdelTOutR   | ACTTTGTTTTGCATCATCAGGCATATACA                               |
|                 | cyaAdelTinF    | GCCAATTTCTTCATCATGAATGAAGAGCGT                              |
|                 | CyaAdelTinR    | CAGTTGATAAAACCAAGTTACGCATCAG                                |
|                 | cyaAdelUPF     | aggtatatgtgatgggttaaaaagatgatcctCCATAGTCACCAACTCCACCTGCA    |
|                 | CyaAdelupR     | ACGTCAACGAGTTACAAGTTTGCTTCCCTGATATGACAGATAAAA               |
|                 | CyaAdeldoF     | ATCAGGGAAGCAAACCTTGTAACCTCGTTGACGTCTCAGGTTTTCTA             |
|                 | CyaAdelDOR     | cgggagagctcgatcgatcggtacctctagGTGGCCCAGTTTGGCCGCAT          |
| <i>Δcrp</i>     | crpdelTouF:    | TTTCAGCGTGTTCCTACGGTCTGA                                    |
|                 | CrpdelTouR:    | AAGGTTTTTCATTAGTGAGCTGAAAGTGGGA                             |
|                 | CrpdelTinF:    | TAAACCTCAAACCGATCCAACACTAGA                                 |
|                 | CrpdelTinR:    | ATCAGGTTCTGCTCTTCCAGCAT                                     |
|                 | crpdelupF:     | aggtatatgtgatgggttaaaaagatgatcctTACTTCTAACCCACTCAATGCCAAAG  |
|                 | CrpdelupR:     | TTATCGGGGCACTTAcataATAATCTCACTTCCCTGTCAGGGTAC               |
|                 | CrpdeloF:      | CAGAGGAAGTGAGATTATTatgTAAGTGCCCCGATAACCCGTCTC               |
|                 | CrpdeloR:      | cgggagagctcgatcgatcggtacctctagAAGAGTGTTACCTGAGCTGCAAG       |
| <i>ΔcpdA</i>    | cpdAdelTouF    | GTGATGAGTCGGACTGAAGCG                                       |
|                 | cpdAdelTouR    | CCCTCTCCACGGTCAGTTTAG                                       |
|                 | cpdAdelTinF    | TCGATCAAGCTTATTTCAGATCAGG                                   |
|                 | cpdAdelTinR    | AAATCAGGTAAAAATCGGCCTTGTT                                   |
|                 | cpdAdelupF     | aggtatatgtgatgggttaaaaagatgatcctTATCAATTGGTCAAAGATGGGCGAA   |
|                 | cpdAdelUPR     | CGAGCAGTCATATCACAAAATCGGTAAACCTAACTCTGTTATTTA               |
|                 | cpdAdeldoF     | GGTTTACCGATTTTGTGATATGACTGCTCGTCCTGCT                       |
|                 | cpdAdeldoR     | ccgggagagctcgatcgatcggtacctctagCCGCTTGGTACTTCTCAACCG        |
| <i>ΔVC0964</i>  | 0964delTUPF    | AACTGCGCACCGAAGGTCAT                                        |
|                 | 0964delTdor    | TATTAAGTGTTGCAACACGGTGCTT                                   |
|                 | 0964DELUPF     | aggtatatgtgatgggttaaaaagatgatcctGCTTTCGATGAAAACATCGAAATCGG  |
|                 | 0964DELUPR     | AATCGAACCAAGCGATTACATTGTGTGCATGCTCCTAACGTTTTA               |
|                 | 0964DELDOF     | GGAGCATGACACAATGTAATCGCTTGGTTTCGATTTAAAACGT                 |
|                 | 0964DELDOR     | ccgggagagctcgatcgatcggtacctctagTCCCATTAACGCGCCGTCAT         |
| <i>ΔVC0672</i>  | 0672delTUPF    | CGGCTAAATGTCGGGATTGTGA                                      |
|                 | 0672delTdor    | AACCAATCATGCCGATATCGC                                       |
|                 | 0672DELUPF     | aggtatatgtgatgggttaaaaagatgatcctTTTGTAACAACCATGGTCAGGTTTT   |
|                 | 0672DELUPR     | TTCACATTTGGTTCCTACATGCTTAACCTCTGTGAGTGTT                    |
|                 | 0672DELDOF     | AGAGGTTAAGCATGTAGGAACCAAATGTGAATATTGAACTCTTAG               |
|                 | 0672DELDOR     | ccgggagagctcgatcgatcggtacctctagAATCGCAAACACAGACCGA          |

|          |                |                                                               |
|----------|----------------|---------------------------------------------------------------|
| ΔVCA0518 | A0518delTUPF   | GCGAGTTCTGTTC AAGTAATTTTGCC                                   |
|          | A0518delTdor   | ATTCATGCTGCGCAGTTGGGCA                                        |
|          | A0518DELUPF    | aggtatatgtgatgggtaaaaagatcgatcctAAACGCGCATAACTGGTGTTTTC       |
|          | A0518DELUPR    | ATGTGATGCCCTTACATTCTTAACTCCTGTCTGCCTCTA                       |
|          | A0518DELDOF    | CAGGAGTTAAGAATGTAAGGGGCATCACATGACAAAAAAA                      |
|          | A0518DELDOR    | ccgggagagctcgatcgcggtacaccttagTGAGATACCTTGTTGGCAAACCTGC       |
| ΔVC1820  | Vc1820delTUPF  | GGCAGGATCTGGATCAACTGTTAC                                      |
|          | Vc1820delTdor  | CCGTCATACCACCAAGAATCGC                                        |
|          | Vc1820DELUPF   | aggtatatgtgatgggtaaaaagatcgatcctATGCGGCCTTTGGTGGCTATAA        |
|          | Vc1820DELUPR   | TAATTTACGCCTTACATTTATTGGCTCATAAAGTATTTAACTGATGA               |
|          | Vc1820DELDOF   | TGAGCCAATAAATGTAAGGCGTGAAATTATGAGTACCCTAAC                    |
|          | Vc1820DELDOR   | ccgggagagctcgatcgcggtacaccttagACCTAACACCACTTTAGAAGCGCC        |
| ΔVC2013  | Vc2013delTUPF  | TCCGACAAGCAACCGATCTTAAAG                                      |
|          | Vc2013delTdor  | ATGGCCAGCTGTTTGGTGGAA                                         |
|          | Vc2013DELUPF   | aggtatatgtgatgggtaaaaagatcgatcctAGGTCGTGAAAGCCTTACCTCT        |
|          | Vc2013DELUPR   | GGGGAAGAATGAGATTACACCCAGTGAAAATGTAACCACTT                     |
|          | Vc2013DELDOF   | ACATTTTACTGGGTGTAATCTCATTCTTCCCCCTAGAGAAAAG                   |
|          | Vc2013DELDOR   | ccgggagagctcgatcgcggtacaccttagCTGGTATTGATGACTTGGCTATTGAAGA    |
| ΔVC1822  | Vc1822delTUPF  | AGACAGCGGTTGGGCAACATG                                         |
|          | Vc1822delTdor  | ATCGCACTAGGCTCACTACCA                                         |
|          | Vc1822DELUPF   | aggtatatgtgatgggtaaaaagatcgatcctGACGCTGGCATTACATCATTCA        |
|          | Vc1822DELUPR   | TGATTCAGAATGTTACACAATTGTTTTACCTTACTGTTGTTGAA                  |
|          | Vc1822DELDOF   | AAGGTAACAATTTGTGTAACATTCTGAATCACTACACTTGAGATAGA               |
|          | Vc1822DELDOR   | ccgggagagctcgatcgcggtacaccttagCTGCACTCATCGTTGGCTTCTG          |
| ΔVC0995  | Vc0995delTUPF  | GTGTAGATTTTGCAGTTCGTTAGCGC                                    |
|          | Vc0995delTdor  | CCTTTTTGAATCAGCTCAATCGCGTATT                                  |
|          | Vc0995DELUPF   | aggtatatgtgatgggtaaaaagatcgatcctATACATAATCAGCTAATCCTCTTGTCGAT |
|          | Vc0995DELUPR   | GTTTAACTCGATTACACCTTAAGTCCCCCTATAGGATTT                       |
|          | Vc0995DELDOF   | GGGGAACCTAAGGTGTAATCGAGTTTAAACCCTAGCCTGAATC                   |
|          | Vc0995DELDOR   | ccgggagagctcgatcgcggtacaccttagCATACAACCTTGCAAAAATAGTCAGAGGAGT |
| ΔVCA1045 | Vca1045delTUPF | AACAACCTTCATCTGTACTATGTGTAGGT                                 |
|          | Vca1045delTdor | TGCAACGGTGGCACAATGCGA                                         |
|          | Vca1045DELUPF  | aggtatatgtgatgggtaaaaagatcgatcctCTTCTACTTACGTATAGTGTACGTTTCAT |
|          | Vca1045DELUPR  | GGAGCAAAAACGTTACATCGCGTCCCCCGTTGGAT                           |
|          | Vca1045DELDOF  | CGGGGACGCGATGTAACGTTTTTGTCTCCTGAGGCAA                         |
|          | Vca1045DELDOR  | ccgggagagctcgatcgcggtacaccttagTCGACTGCGGAATCCACAAAGC          |
| ΔVC0911  | Vc0911delTouTF | TGATTGGTTCGACGCTGTTGG                                         |
|          | Vc0911delTouTR | CTATAGGGGTGACTCAATCAGGATGATG                                  |
|          | Vc0911delupF   | aggtatatgtgatgggtaaaaagatcgatcctCTTCATGTATGCTCCTCTCGTATTAC    |
|          | Vc0911delupR   | AGACACCTTGTGCTcatACTACTCTCACTTACTCAAAAAAATTGACT               |
|          | Vc0911delDOF   | AAGTGAGAGTAGTatgAGCAACAAGGTGTCTCTGAAAGTG                      |

|             |                      |                                                                 |
|-------------|----------------------|-----------------------------------------------------------------|
|             | Vc0911delDOR         | ccgggagagctcgatcgcgatcggtacaccttagCGTGTTCGTATGGACGTAACACT       |
| ΔVC0910     | Vc0910delToutF       | CGCCTATCTCAATTGGTGTGTTGA                                        |
|             | Vc0910delToutR       | CACCACCGTTAACCGGCTTACG                                          |
|             | Vc0910delupF         | aggtatatgtgatgggtaaaaagatcgatcctGCATGAGATTGTGGCGAATTACCA        |
|             | Vc0910delupR         | AATCGGGTAGAGAttaCACCTATTGAATTATTATCATTGCAGCA                    |
|             | Vc0910delDOF         | TTCAATAGGGTGtaaTCTCTACCCGATTGAGGAGTGG                           |
|             | Vc0910delDOR         | ccgggagagctcgatcgcgatcggtacaccttagCCAAATATAGTAATCACGGTAAGGGCTAT |
| ΔVCA0245    | Vca0245delToutF      | GTTACGCGCCGAAGAAGATGC                                           |
|             | Vca0245delToutR      | CGAGTGCCATTGCGGAGATCTC                                          |
|             | Vca0245delupF        | aggtatatgtgatgggtaaaaagatcgatcctACAAGGTAGTATCACGGTCAGTGA        |
|             | Vca0245delupR        | TACATACTCCCTCctaCATGGTTCTATCTCCAGAGTAGAGCT                      |
|             | Vca0245delDOF        | TGGAGATAGAACCATGtagGAGGGAGTATGTACAGCGAACT                       |
|             | Vca0245delDOR        | ccgggagagctcgatcgcgatcggtacaccttagTGTGCACCGCATCTTCGGCATT        |
| qRT-PCR     | toxTf                | GCGTTGGGCAGATATTTGTGG                                           |
|             | toxTR                | GAAACGCTAGCAAACCCAGAC                                           |
|             | tcpAf                | CTACCGCAAACGCAAATGCT                                            |
|             | tcpAR                | GGTCAAGCCACCGACTGTAA                                            |
|             | ctxAf                | TTGGAGCATTCCCACAACCC                                            |
|             | ctxAR                | GCTCCAGCAGCAGATGGTTA                                            |
|             | ToxRf                | GGTTTGGCTCGGGTTAGTGA                                            |
|             | toxrR                | CAGCCAGCCAATGTTGTGAC                                            |
|             | toxSf                | AGTGACGTCTACCCGACTGA                                            |
|             | toxSr                | CTGCTGCTCAGTAGCTGGTT                                            |
|             | gyrBf                | GTGGTTTCGGTGAAAGTGCC                                            |
|             | gyrBr                | GTTTTTCGCTTCGCTTGGGT                                            |
|             | AphAf                | CGATGCAACCGGGTACGATA                                            |
|             | AphAr                | TGGTTTGCCTTCTGTGGTT                                             |
|             | AphBf                | CTTGGCTGTTGGTCAGTTGC                                            |
|             | AphBr                | GGTTGCCAGCCCTCAATACT                                            |
|             | cyaAf                | TCATCCTCTGATCCCCGGTT                                            |
|             | cyaAr                | ACAAGCCTAAAATCGCCGGA                                            |
|             | Crpf                 | TCTTGATGCGCCTTTCAGGT                                            |
|             | crpR                 | TCTGGCTGACGTGCAAGATT                                            |
|             | cpdAf                | CATTACTGTGCTTGGCGACG                                            |
|             | cpdAr                | GCAAACCTGAGTGAGCAGCAG                                           |
|             | tcpPf                | GGGGTATGTCCGCGTGATTT                                            |
|             | tcpPr                | GCTTGGTGTACCAATCAGCC                                            |
| TCPHF       | TAACGATCATCGCACTCCCG |                                                                 |
| TCPHR       | GTGGATCGGTCTGGGTAAGC |                                                                 |
| PtlI(H189A) | VC0965H189AUPR       | AGCCATGATAGAAGTTGAGAGGTACGGCCGCCAA                              |
|             | VC0965H189ADOF       | GGCGGCCGTACCTCTGCAACTTCTATCATGGCTCGCTCTCT                       |



|                  |               |                                          |
|------------------|---------------|------------------------------------------|
| PtsH(H15A)       | VC0966H15AUPR | TGCAGCAGGACGAGTTGCAAGGCCGTTTTCTGCAGT     |
|                  | VC0966H15ADOF | GCAGAAAACGGCCTTGCAACTCGTCCTGCTGCACAGT    |
| <hr/>            |               |                                          |
| VC0964(H91<br>D) | VC0964H91Dupr | CGTGTCGATACCGAAGTCAACAAACAGCTCAACGCCGTCA |
|                  | Vc0964H91Ddof | GTTGAGCTGTTTGTTGACTTCGGTATCGACACGGTTGA   |
| <hr/>            |               |                                          |

\*Lowercase nucleotides indicate the overhangs used for isothermal assembly in the construction of the plasmids.

Table S2 Genes found by TIS to be required for expression and Carb resistance from *PtcpA-bla*

| Classification                                                     | Locus       | Gene name             | MannU ( <i>p</i> -value)*                       | TIGR annotation                                             | Reference |
|--------------------------------------------------------------------|-------------|-----------------------|-------------------------------------------------|-------------------------------------------------------------|-----------|
| <b>Carb-response related genes</b>                                 | VC2635      | <i>pbp1A</i>          | 1.0×10 <sup>-10</sup>                           | penicillin-binding protein 1A                               | 1         |
|                                                                    | VC1887      | <i>csiV</i>           | 0.00026                                         | hypothetical protein                                        | 2         |
|                                                                    | VC2300      | <i>ampG</i>           | 0.00004                                         | AmpG protein, putative                                      | 3         |
|                                                                    | VC0581      | <i>lpoA</i>           | 1.0×10 <sup>-10</sup>                           | lipoprotein, putative                                       | 1         |
| <b>Established TCP regulators</b>                                  | VC0838      | <i>tcpN/toxT</i>      | 0.00001                                         | TCP pilus virulence regulatory protein                      | 4         |
|                                                                    | VC1049      | <i>aphB</i>           | 1.0×10 <sup>-10</sup>                           | transcriptional regulator, LysR family                      | 5         |
|                                                                    | VC2647      | <i>aphA</i>           | 1.0×10 <sup>-10</sup>                           | PadR family transcriptional regulator                       | 6         |
|                                                                    | VC0826      | <i>tcpP</i>           | 1.0×10 <sup>-10</sup>                           | toxin co-regulated pilus biosynthesis protein P             | 7         |
|                                                                    | VC0827      | <i>tcpH</i>           | 1.0×10 <sup>-10</sup>                           | toxin co-regulated pilus biosynthesis protein H             | 8         |
|                                                                    | VC0984      | <i>toxR</i>           | 0.00006                                         | regulatory protein ToxR                                     | 9         |
|                                                                    | VC1021      | <i>luxO</i>           | 1.0×10 <sup>-10</sup>                           | LuxO repressor protein                                      | 10        |
|                                                                    | VC0347      | <i>hfq</i>            | 0.00073                                         | host factor-I, putative                                     | 11        |
|                                                                    | VC2529      | <i>rpoN</i>           | 1.0×10 <sup>-10</sup>                           | RNA polymerase sigma-54 factor                              | 12        |
|                                                                    | VC0034      | <i>tcpG/dsbA</i>      | 0.00025                                         | thiol:disulfide interchange protein                         | 13        |
| <b>Established factors involved in <i>in vivo</i> colonization</b> | VC0965      | <i>ptsI</i>           | 1.0×10 <sup>-10</sup>                           | phosphoenolpyruvate-protein phosphotransferase, EI          | 14        |
|                                                                    | VC2433      | <i>cpdA</i>           | 0.00419                                         | cyclic AMP phosphodiesterase                                | 14        |
|                                                                    | VC1097      | <i>pta</i>            | 0.00014                                         | phosphate acetyltransferase                                 | 14        |
|                                                                    | VC0724      | <i>pstC-1</i>         | 1.0×10 <sup>-10</sup>                           | phosphate ABC transporter, permease protein                 | 14        |
|                                                                    | VC0725      | <i>pstA-1</i>         | 0.00014                                         | phosphate ABC transporter, permease protein                 | 14        |
|                                                                    | VC1839      | <i>tolQ</i>           | 0.00074                                         | TolQ protein                                                | 14,15     |
|                                                                    | VC1716      | <i>mukF</i>           | 0.00094                                         | MukF protein                                                | 14        |
|                                                                    | VC1714      | <i>mukB</i>           | 1.0×10 <sup>-10</sup>                           | cell division protein MukB                                  | 14        |
| <b>Other putative TCP regulators</b>                               | VC0966      | <i>ptsH</i>           | 0.00009                                         | Phosphocarrier protein HPr                                  |           |
|                                                                    | VC0547      | <i>aspK</i>           | 0.00103                                         | aspartokinase, alpha and beta subunits                      |           |
|                                                                    | VC0419      | <i>cafA</i>           | 1.0×10 <sup>-10</sup>                           | ribonuclease G/cytoplasmic axial filament protein           |           |
|                                                                    | VC2736      | <i>hslO/hsp33</i>     | 0.00005                                         | 33 kDa chaperonin (Heat shock protein 33 ) (HSP33)          |           |
|                                                                    | VC2153      | VC2153                | 0.00128                                         | D,D carboxypeptidase-related protein                        |           |
|                                                                    | VC0346      | <i>miaA</i>           | 0.00026                                         | tRNA delta(2)-isopentenylpyrophosphate transferase          |           |
|                                                                    | VC2775      | <i>mmnG/gidA</i>      | 0.00372                                         | tRNA uridine 5-carboxymethylaminomethyl modification enzyme |           |
|                                                                    | VC0556      | <i>gshA</i>           | 0.00001                                         | glutamate--cysteine ligase                                  |           |
|                                                                    | VC2033      | <i>adhE</i>           | 1.0×10 <sup>-10</sup>                           | alcohol dehydrogenase/acetaldehyde dehydrogenase            |           |
|                                                                    | VC1866      | <i>pflB</i>           | 0.00012                                         | formate acetyltransferase                                   |           |
|                                                                    | VC0003      | <i>mmnE/trmE/thdF</i> | 0.0008                                          | thiophene and furan oxidation protein ThdF                  |           |
| VCA0511                                                            | <i>nrdD</i> | 1.0×10 <sup>-10</sup> | anaerobic ribonucleoside-triphosphate reductase |                                                             |           |

\*Limit of detection and cutoff are *p*-value <1.0×10<sup>-10</sup> and *p*-value <0.005, respectively, with the Mann Whitney U-based analysis of the TIS data.

## References

- 1 **Dörr T, Moll A, Chao MC, Cava F, Lam H, Davis BM, Waldor MK.** 2014. Differential requirement for PBP1a and PBP1b in *in vivo* and *in vitro* fitness of *Vibrio cholerae*. *Infect. Immun.* **82**:2115-2124.
- 2 **Dörr T, Lam H, Alvarez L, Cava F, Davis BM, Waldor MK.** 2014. A novel peptidoglycan binding protein crucial for PBP1A-mediated cell wall biogenesis in *Vibrio cholerae*. *PLoS Genet.* **10**:e1004433.
- 3 **Lindquist S, Weston-Hafer K, Schmidt H, Pul C, Korfmann G, Erickson J, Sanders C, Martin HH, Normark S.** 1993. AmpG, a signal transducer in chromosomal  $\beta$ -lactamase induction. *Mol. Microbiol.* **9**:703-715.
- 4 **Higgins DE, Nazarend E, DiRita VJ.** 1992. The virulence gene activator ToxT from *Vibrio cholerae* is a member of AraC family of transcriptional activators. *J. Bacteriol.* **174**:6974-6980.
- 5 **Kovacikova G, Skorupski K.** 1999. A *Vibrio cholerae* LysR homolog, AphB, cooperates with AphA at the *tcpPH* promoter to activate expression of the ToxR virulence cascade. *J. Bacteriol.* **181**:4250-4256.
- 6 **Skorupski K, Taylor RK.** 1999. A new level in the *Vibrio cholerae* ToxR virulence cascade: AphA is required for transcriptional activation of the *tcpPH* operon. *Mol. Microbiol.* **31**:763-771.
- 7 **Beck NA, Krukonis ES, DiRita VJ.** 2004. TcpH influences virulence gene expression in *Vibrio cholerae* by inhibiting degradation of the transcription activator TcpP. *J. Bacteriol.* **186**:8309- 8316.
- 8 **Carroll PA, Tashima KT, Rogers MB, DiRita VJ, Calderwood SB.** Phase variation in *tcpH* modulates expression of the ToxR regulon in *Vibrio cholerae*. *Mol. Microbiol.* 1997, **25**:1099-1111.
- 9 **Peterson KM, Mekalanos JJ.** 1988. Characterization of the *Vibrio cholerae* ToxR regulon: identification of novel genes involved in intestinal colonization. *Infect. Immun.* **56**:2822-2829.
- 10 **Miller MB, Skorupski K, Lenz DH, Taylor RK, Bassler BL.** 2002. Parallel quorum sensing systems converge to regulate virulence in *Vibrio cholerae*. *Cell* **110**:303-314.
- 11 **Lenz DH, Mok KC, Lilley BN, Kulkarni RV, Wingreen NS, Bassler BL.** 2004. The small RNA chaperone Hfq and multiple small RNAs control quorum sensing in *Vibrio harveyi* and *Vibrio cholerae*. *Cell* **118**:69-82.

12 **Lilley BN, Bassler BL.** 2000. Regulation of quorum sensing in *Vibrio harveyi* by LuxO and sigma-54. *Mol. Microbiol.* **36**:940-954.

13 **Peek JA, Taylor RK.** 1992. Characterization of a periplasmic thiol: disulfide interchange protein required for the functional maturation of secreted virulence factors of *Vibrio cholerae*. *Proc. Natl. Acad. Sci. U. S. A.* **89**:6210-6214.

14 **Merrell DS, Hava DL, Camilli A.** 2002. Identification of novel factors involved in colonization and acid tolerance of *Vibrio cholerae*. *Mol. Microbiol.* **43**:1471-1491.

15 **Bina JE, Mekalanos JJ.** 2001. *Vibrio cholerae tolC* is required for bile resistance and colonization. *Infect. Immun.* **69**: 4681-4685.
